# Supplementary material
Source: publisher figshare collection journal article supplement (https://frontiersin.figshare.com/ndownloader/files/30805600)
Supplement: Supplementary file 1 [file 30805600]

Supplementary Material for

The roles of iron in phytoplankton dynamics in the western and eastern subarctic Pacific

Hao-Ran Zhang1,2, Yuntao Wang2, Peng Xiu3, Yiquan Qi1, Fei Chai2,4

1 College of Oceanography, Hohai University, Nanjing, China

2 State Key Laboratory of Satellite Ocean Environment Dynamics, Second Institute of Oceanography, Ministry of Natural Resources, Hangzhou, China

3 State Key Laboratory of Tropical Oceanography, South China Sea Institute of Oceanology, Chinese Academy of Sciences, Guangzhou, China

4 School of Marine Sciences, University of Maine, Orono, ME, United States

*** Correspondence:**Yuntao Wang
yuntao.wang@sio.org.cn

# 1 Supplementary Figure and Table

1.1 Supplementary Table

Model parameters (temperature of 10 °C used in model simulations)

| Symbols | Descriptions | Values | | Units | Sources |
| --- | --- | --- | --- | --- | --- |
| ψ1 | NH4 inhibition for S1 | 1.5 | mmol N m-3 | | (3), (6) |
| ψ2 | NH4 inhibition for S2 | 1.5 | mmol N m-3 | | (3), (6) |
| kno3_s1 | Half-saturation for NO3 uptake by S1 | 0.5 | mmol N m-3 | | (6) |
| knh4_s2 | Half-saturation for NH4 uptake by S1 | 0.05 | mmol N m-3 | | (6) |
| kno3_s2 | Half-saturation for NO3 uptake by S2 | 1.0 | mmol N m-3 | | (6) |
| knh4_s1 | Half-saturation for NH4 uptake by S2 | 0.1 | mmol N m-3 | | (6) |
| ksi_s1 | Half-saturation for SiO4 uptake by S2 | 3.0 | mmol Si m-3 | | (3) |
| Kpo4_s1 | Half-saturation for PO4 uptake by S1 | 0.02 | mmol N m-3 | | (6) |
| Kpo4_s2 | Half-saturation for PO4 uptake by S2 | 0.05 | mmol Si m-3 | | (6) |
| μ1max | Maximum growth rate of S1 | 2.0 (Papa),  1.2 (K2) | d-1 | | (4), (5) |
| μ2max | Maximum growth rate of S2 | 3.0 | d-1 | | (4) |
| γ1 | Grazing efficiency of Z1 | 0.3 | - | | (3), (5) |
| γ2 | Grazing efficiency of Z2 | 0.3 | - | | (3), (5) |
| γ3 | S1 mortality | 0.087 | d-1 | | (3) |
| γ4 | S2 mortality | 0.02 | d-1 | | (4) |
| γ5 | Remineralization rate of PONS | 0.1 | d-1 | | (4) |
| γ6 | Aggregation rate | 0.06 | d-1 | | this study |
| γ7 | Nitrification rate | 0.1 | d-1 | | this study |
| γ8 | Remineralization rate of PONL | 0.8 | d-1 | | this study |
| γ9 | Remineralization rate of bSiO2 | 0.3 | d-1 | | this study |
| γ10 | Loss rate of Z2 | 0.05 | d-1 | | (1), (4) |
| reg1 | Excretion rate of Z1 | 0.1 | d-1 | | (4) |
| reg2 | Excretion rate of Z2 | 0.05 | d-1 | | (4) |
| αs1 | Initial slope of P-I curve of S1 | 0.025 (Papa), 0.018 (K2) | (W m-2)-1 d-1 | | (1), (4) |
| α s2 | Initial slope of P-I curve of S2 | 0.025 (Papa)  0.029 (K2) | (W m-2)-1 d-1 | | (1), (4) |
| G1max | Maximum grazing rate by Z1 | 1.3 | d-1 | | (5) |
| G2max | Maximum grazing rate by Z2 | 0.8 | d-1 | | this study |
| ρ1 | Z2 grazing preference for P2 | 0.70 | - | | (1), (4) |
| ρ2 | Z2 grazing preference for Z1 | 0.20 | - | | (1), (4) |
| ρ3 | Z2 grazing preference for PONS | 0.03 | - | | (4) |
| ρ4 | Z2 grazing preference for PONL | 0.07 | - | | (4) |
| K1gr | Half-saturation constant for Z1 grazing | 0.5 | mmol N m-3 | | (1), (4) |
| K2gr | Half-saturation constant for Z2 grazing | 0.25 | mmol N m-3 | | (1), (4) |
| W1 | Sinking velocity of S1 and Chl1 | 0.1 | m d-1 | | (4) |
| W2 | Sinking velocity of S2 and Chl2 | 0.6 | m d-1 | | (4) |
| W3 | Sinking velocity of bSiO2 | 60 | m d-1 | | (4) |
| Wsd | Sinking velocity of PONS | 2 | m d-1 | | (4) |
| Wsd2 | Sinking velocity of PONL | 40 | m d-1 | | this study |
| Wdust | Sinking velocity of dust particles | 0.1 | m d-1 | | (6) |
| RPN | Ratio of P to N | 0.0625 | mol P/mol N | | (1), (4) |
| RCN | Ratio of C to N | 6.625 | mol C/mol N | | (1), (4) |
| RSiN | Ratio of Si to N | 1.5 | mol Si/mol N | | (1), (4) |
| RO2NO3 | Ratio of O2 to NO3 | 8.625 | mol O2/mol NO3 | | (4) |
| RO2NO3 | Ratio of O2 to NH4 | 6.625 | mol O2/mol NH4 | | (4) |
|  | Maximum ratio of Chl-a to carbon | 0.05 | - | | (4) |
| kT | Temperature coefficient for the rate of biological activity | 0.0693 | °C-1 | | (2) |
| S1Z1 | Threshold value for Z1 grazing on S1 | 0.045 | mmol N m-3 | | (3) |
| S2Z2 | Threshold value for Z2 grazing on S2 | 0.045 | mmol N m-3 | | (3) |
| Z1Z2 | Threshold value for Z2 grazing on Z1 | 0.08 | mmol N m-3 | | this study |
| rmn | Mass:N ratio in organic matter | 159 | g mol-1 | | (6) |
| Qfemin | Minimum Fe:N ratio in organic matter | 0.0066 | μmol m-3 (mmol m-3)-1 | | (6) |
| Qfemax | Maximum Fe:N ratio in organic matter | 0.033 | μmol m-3 (mmol m-3)-1 | | (6) |
| kcoag1 | Coagulation rate | 0.0003888 | m3 (mg d)-1 | | (6) |
| kcoag2 | Coagulation rate | 0.0009504 | m3 (mg d)-1 | | (6) |
| kcoag3 | Coagulation rate | 0.0013 | m3 (mg d)-1 | | (6) |
| kcoag4 | Coagulation rate | 0.0011 | m3 (mg d)-1 | | (6) |
| Ksca | Soluble iron scavenging rate | 0.00015 | m3 (mg d)-1 | | (6) |
| PARref | Reference PAR | 400.0 | W m-2 | | (6) |
| kph1 | Colloidal iron photoreduction rate | 20.2 | d-1 | | (6) |
| kph4 | Particulate iron photoreduction rate | 20.2 | d-1 | | (6) |
| kpd | Particulate iron redissolution rate | 0.015 | d-1 | | (6) |
| kcol | Colloidal iron formation rate | 2.4 | d-1 | | (6) |
| kcd | Colloidal iron redissolution rate | 0.41 | d-1 | | (6) |
| kag | Colloidal iron aggregation rate | 0.002448 | m3 (mg d)-1 | | this study |
| kflwd | Weak ligand iron dissociation rate | 8.64 | d-1 | | (6) |
| kflsd | Strong ligand iron dissociation rate | 0.1 | d-1 | | (6) |
| kfel | Ligand iron formation rate | 35.0 | (μmol m-3 d)-1 | | (6) |
| kphls | Strong ligand iron photoreduction rate | 0.38 | d-1 | | (6) |
| kphlw | Weak ligand iron photoreduction rate | 7.6 | d-1 | | (6) |
| fγp1 | Ligand production rate by S1 | 0.1 | d-1 | | (6) |
| fγp2 | Ligand production rate by S2 | 0.1 | d-1 | | (6) |
| fγls | Strong ligand remineralization rate | 0.03 | d-1 | | (6) |
| fγlw | Weak ligand remineralization rate | 0.00001 | d-1 | | (6) |
| fγd1 | Ligand release rate from detritus | 0.01 | d-1 | | (6) |
| kfe_s1 | Iron half saturation for S1 | 0.18 | μmol m-3 | | this study |
| kfe_s1 | Iron half saturation for S2 | 0.36 | μmol m-3 | | this study |

1. Chai, F., Dugdale, R. C., Peng, T. H., Wilkerson, F. P., & Barber, R. T. (2002). One-dimensional ecosystem model of the equatorial Pacific upwelling system. Part I: model development and silicon and nitrogen cycle. *Deep. Res. Part II Top. Stud. Oceanogr.* 49(132–14), 27132–2745. doi: 10.1016/S0967-0645(02)00055-3.
2. Fujii, M., Nojiri, Y., Yamanaka, Y., & Kishi, M. J. (2002). A one-dimensional ecosystem model applied to time-series Station KNOT. *Deep. Res. Part II Top. Stud. Oceanogr.* 49(242–25), 5441–5461. doi: 10.1016/S0967-0645(02)00207-2.
3. Fujii, M., Yamanaka, Y., Nojiri, Y., Kishi, M. J., & Chai, F. (2007). Comparison of seasonal characteristics in biogeochemistry among the subarctic North Pacific stations described with a NEMURO-based marine ecosystem model. *Ecol. Model.* 202(1–2): 52–67. doi: 10.1016/j.ecolmodel.2006.02.046.
4. Ma, W., Xiu, P., Chai, F., & Li, H. (2019). Seasonal variability of the carbon export in the central South China Sea. *Ocean Dyn.* 69(8), 955–966. doi: 10.1007/s10236-019-01286-y.
5. Pena MA (2003) Modelling the response of the planktonic food web to iron fertilization and warming in the NE subarctic Pacific. *Prog. Oceanogr.* 57(32–4): 4532–479. doi: 10.1016/S0079-6611(03)00110-1.
6. Xiu, P., & Chai, F. (2021). Impact of atmospheric deposition on carbon export to the deep ocean in the subtropical Northwest Pacific. *Geophys. Res. Lett.* 48, e2020GL089640. doi: 10.1029/2020GL089640.

1.2 Supplementary Figures


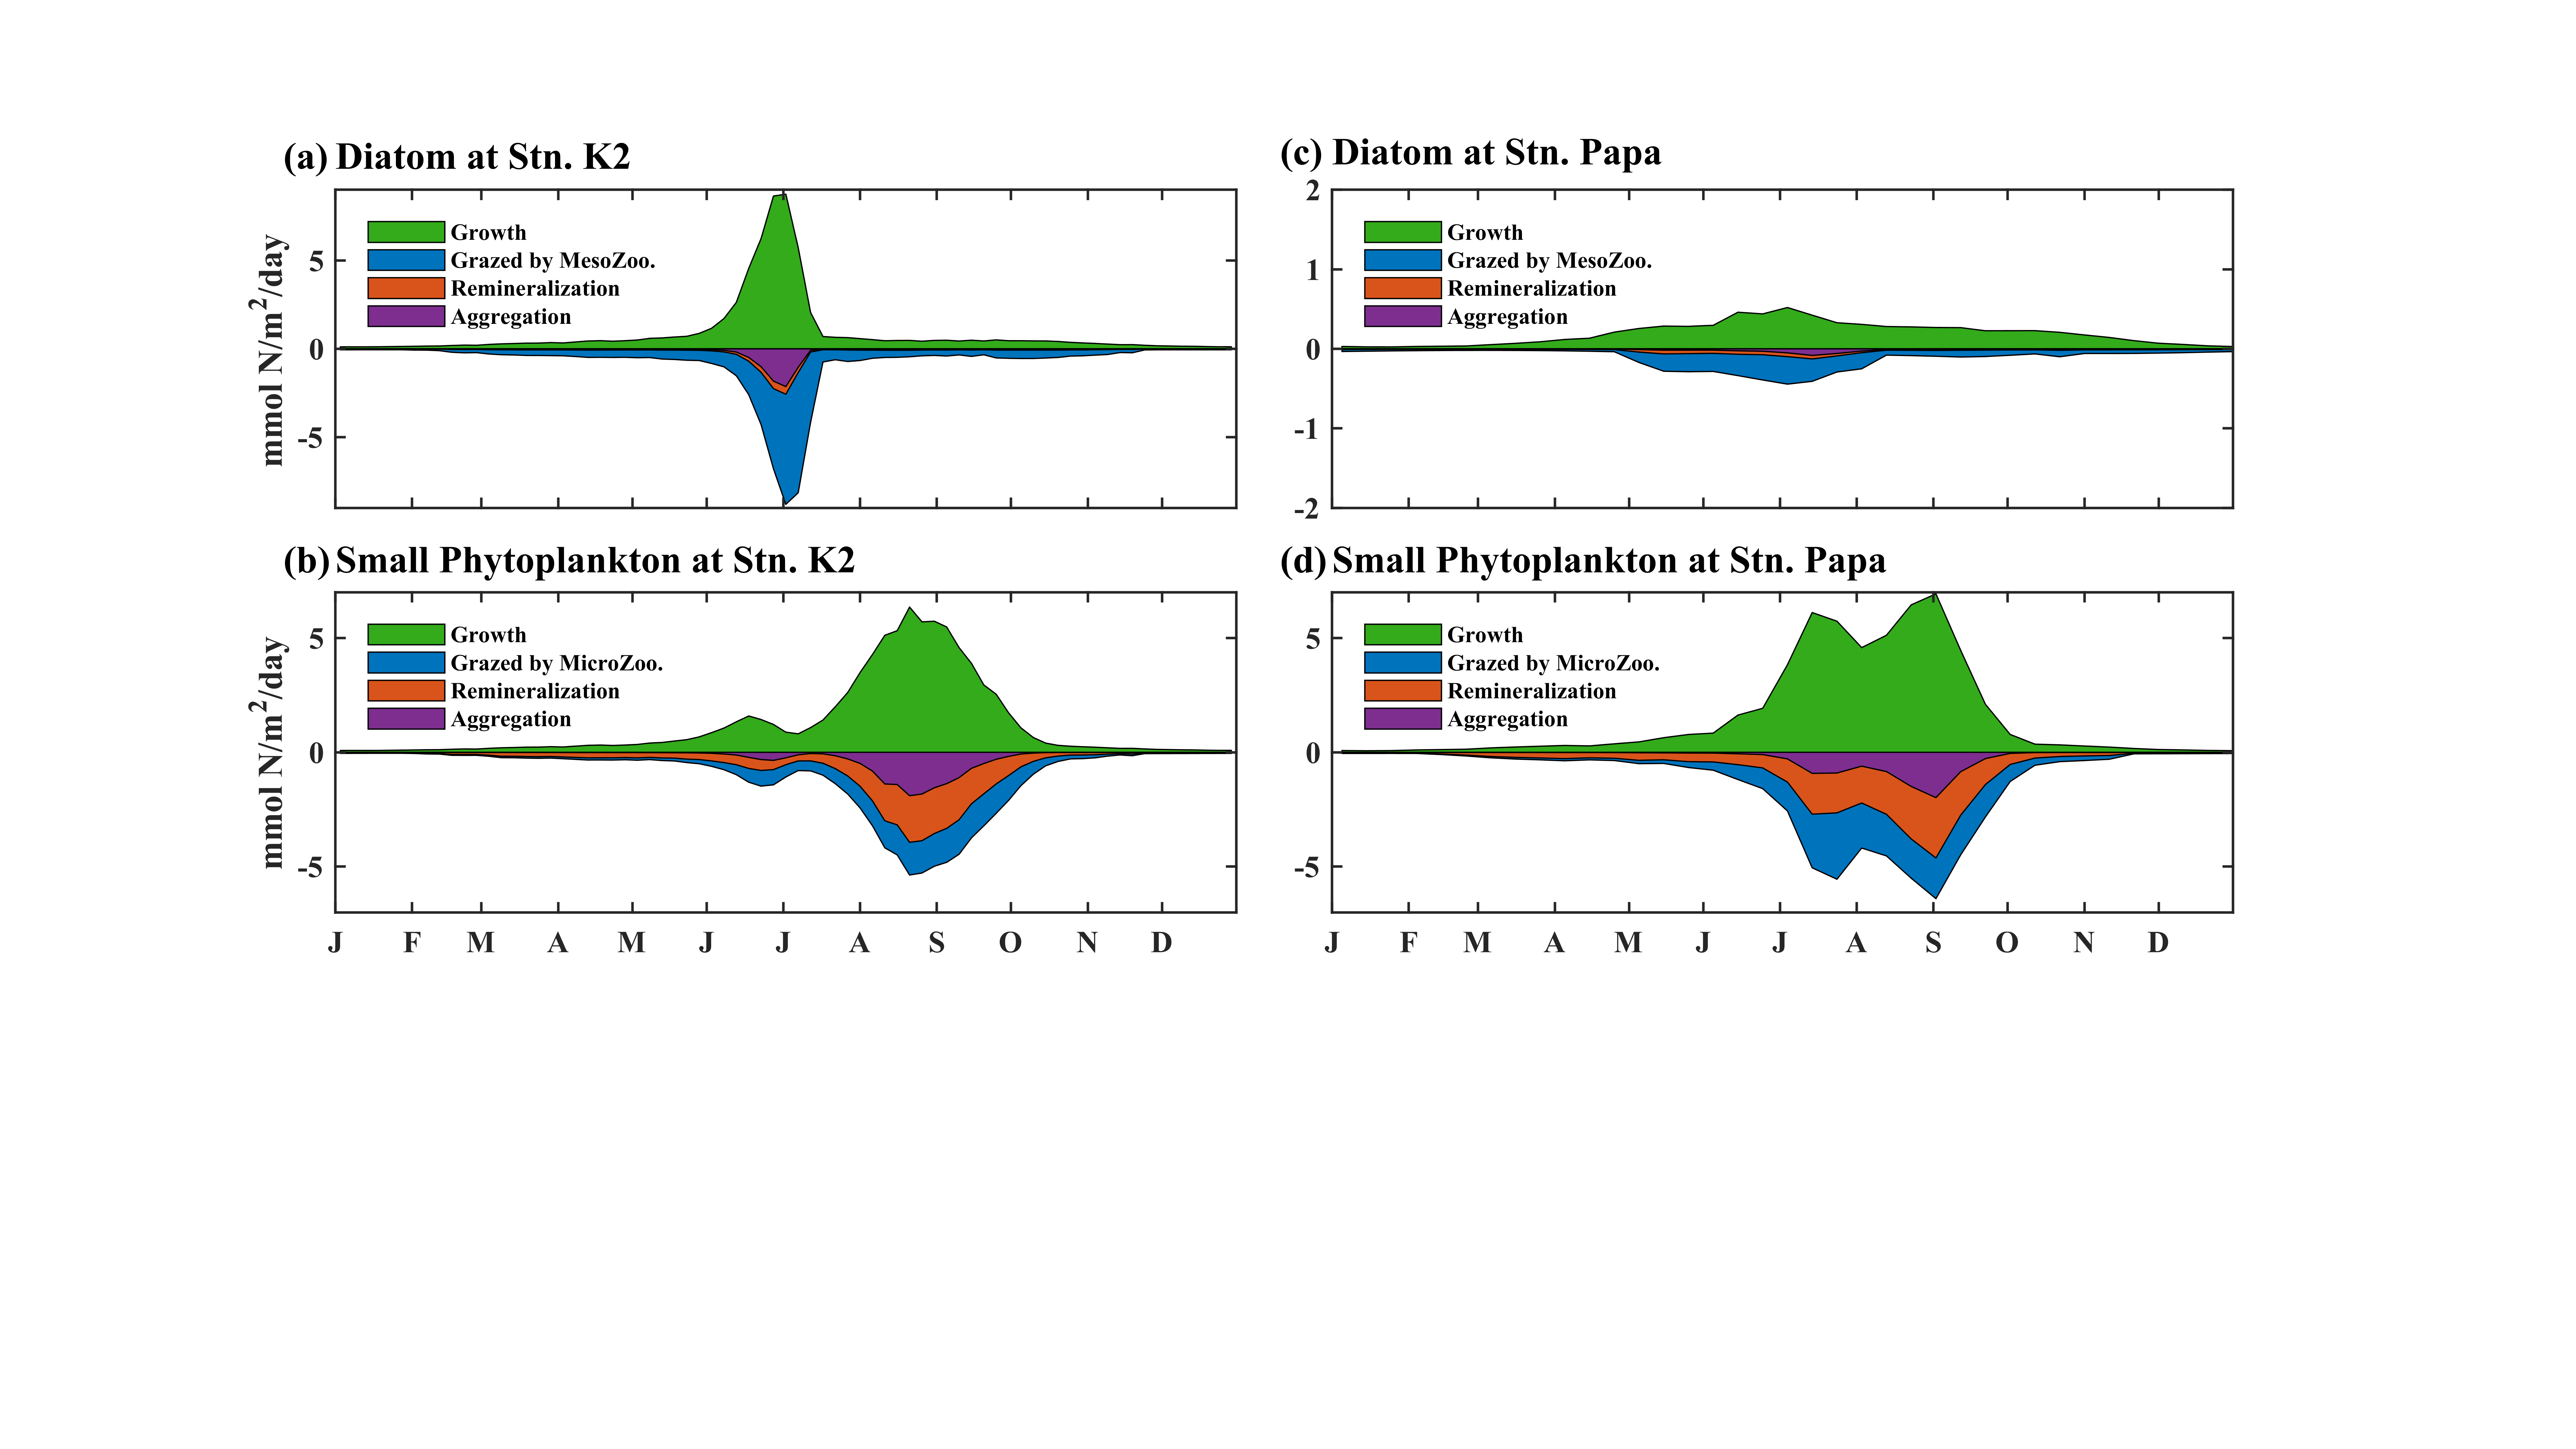


**Supplementary Figure 1.** Modeled time series of vertically depth-integrated (0–150 m) (a, c) grazing by mesozooplankton, mortality, aggregation, and growth of diatom and (b, d) grazing by microzooplankton, mortality, aggregation, and growth of small phytoplankton at (a, b) Stn. K2 and (c, d) Stn. Papa.


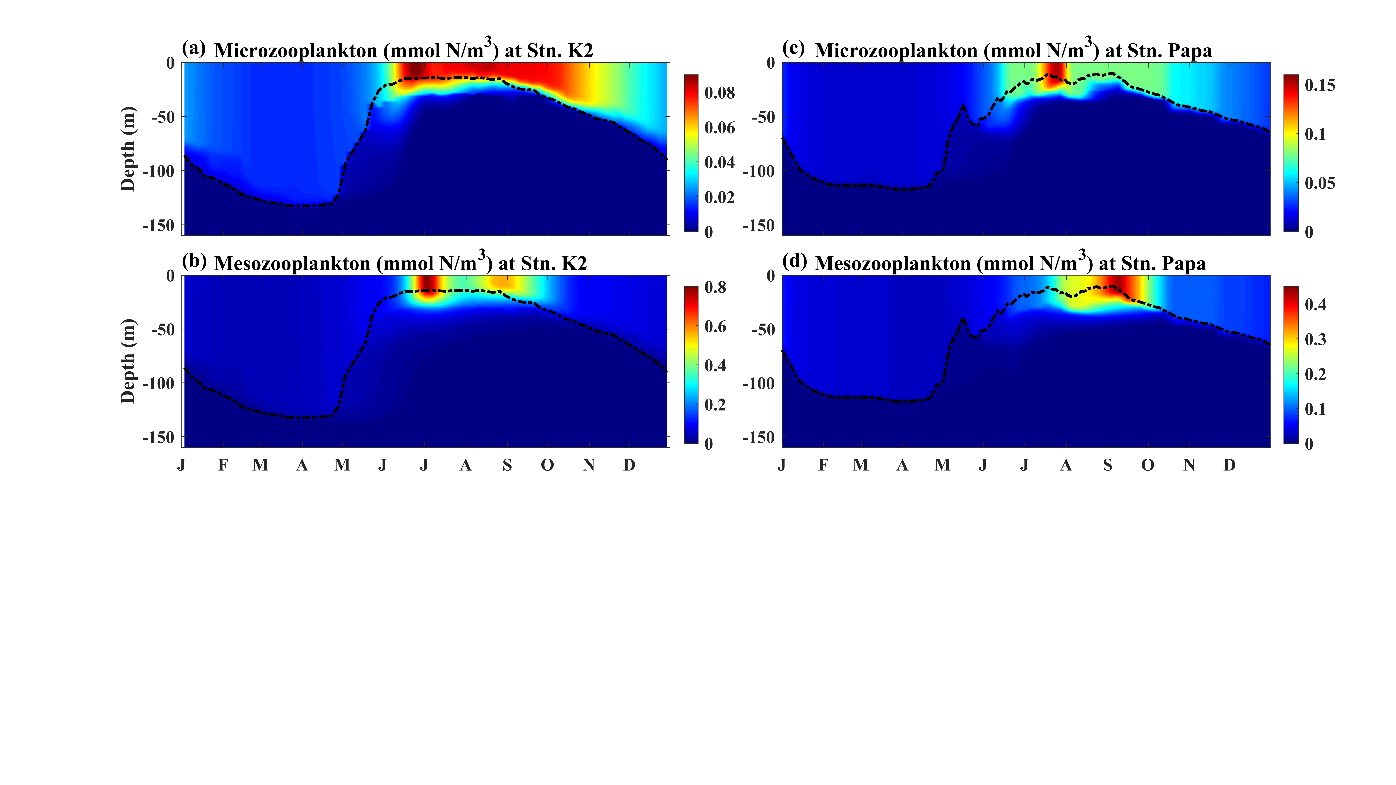


**Supplementary Figure 2.** Modeled seasonal cycle of vertical profiles of (a, c) microzooplankton biomass and (b, d) mesozooplankton biomass at (a, b) Stn. K2 and (c, d) Stn. Papa. The black dashed lines represent the MLD.

**Supplementary Figure 3.** Modeled depth-integrated (0–150 m) chlorophyll concentration (IChl, mg/m2) in model experiments: (a) the thresholds for small phytoplankton are 0.025 and 0.065, (b) the thresholds for diatoms are 0.025 and 0.065, and (c) the thresholds for microzooplankton are 0.04 and 0.12 at Stn. Papa. The thresholds of the control run for small phytoplankton, diatoms and microzooplankton are 0.045, 0.045 and 0.08, respectively. The green solid circles are the BGC-Argo observations at Stn. Papa.
